# Supplementary material for: Web-Based Medical Appointment Systems: A Systematic Review
Source: PubMed Central journal article supplement (PMC5425771; doi:10.2196/jmir.6747), 2017-04-26
Supplement: jmir_v19i4e134_app1.pdf [file jmir_v19i4e134_app1.pdf]

## Multimedia Appendix 1. Summary of the 21 Web-based scheduling systems

| Service or Provider Names             | Features                                                                                                                                                                                                                                                                                                                                             | Assessment Methods                                                                                    | Results                                                                                                                                                                                                                                                                                                                                                                                                                                                                                                                                       | Improved Metrics                                                                                                                                                                                                      |
|---------------------------------------|------------------------------------------------------------------------------------------------------------------------------------------------------------------------------------------------------------------------------------------------------------------------------------------------------------------------------------------------------|-------------------------------------------------------------------------------------------------------|-----------------------------------------------------------------------------------------------------------------------------------------------------------------------------------------------------------------------------------------------------------------------------------------------------------------------------------------------------------------------------------------------------------------------------------------------------------------------------------------------------------------------------------------------|-----------------------------------------------------------------------------------------------------------------------------------------------------------------------------------------------------------------------|
| Choose and Book [1-3]                 | <ul style="list-style-type: none"> <li>UK national appointment system for National Health Service (NHS)</li> <li>Supports Web-based appointments</li> <li>Supports electronic referrals</li> </ul>                                                                                                                                                   | Retrospective analysis of patient attendance data. [2]                                                | Appointments booked with "Choose and Book" had a significantly lower no-show rate than those made by traditional appointment methods. This system optimized the referral process, reduced delays, and streamlined outpatient referral pathways.                                                                                                                                                                                                                                                                                               | <ul style="list-style-type: none"> <li>Reduced no-show rate</li> <li>Optimized the referral process</li> <li>Reduced wait time</li> </ul>                                                                             |
| Holdsworth House Medical Practice [4] | <ul style="list-style-type: none"> <li>Asynchronous</li> <li>The appointment service is a component of the Australian practice's "e-communication" system</li> <li>Email-based</li> <li>Appointments are confirmed by email or text messages</li> </ul>                                                                                              | Not reported                                                                                          | This system was efficient and saved clinicians' valuable time. Many patients preferred to use this system.                                                                                                                                                                                                                                                                                                                                                                                                                                    | <ul style="list-style-type: none"> <li>Improved efficiency</li> <li>Reduced staff labor</li> </ul>                                                                                                                    |
| ZocDoc [5]                            | <ul style="list-style-type: none"> <li>Real-time</li> <li>Medical appointment SaaS</li> <li>Supports same-day appointments</li> <li>Practices can track confirmed appointments, cancellations, and missed appointments</li> </ul>                                                                                                                    | Retrospective analysis of ZocDoc appointment records for 3 dermatology clinics over a 6-month period. | Appointments booked with ZocDoc had a much lower no-show rate (6.9%) than those made by traditional appointment methods at dermatology clinics.                                                                                                                                                                                                                                                                                                                                                                                               | <ul style="list-style-type: none"> <li>Reduced no-show rate</li> </ul>                                                                                                                                                |
| WAS [6]                               | <ul style="list-style-type: none"> <li>Asynchronous</li> <li>Proprietary appointment system for Xijing hospital in China</li> <li>Patients receive appointment numbers to register their visits</li> </ul>                                                                                                                                           | Follow-up telephone interviews with users.                                                            | Patients using WAS were more satisfied than patients using the usual queuing method (71.7% vs. 49.0%, $P < .001$ ). The average invalid waiting time for queuing and WAS were significantly different (86 minutes vs 7 minutes, $P < .001$ ).                                                                                                                                                                                                                                                                                                 | <ul style="list-style-type: none"> <li>Increased satisfaction</li> <li>Reduced wait time</li> </ul>                                                                                                                   |
| eTriage [7]                           | <ul style="list-style-type: none"> <li>Real-time</li> <li>Web-based appointment service for sexual health clinics in the UK</li> </ul>                                                                                                                                                                                                               | Questionnaire-based survey completed on attendance.                                                   | 100% of patients can get an appointment within 48 hours, compared to 48% of patients using regular appointment methods. 70% of the users were satisfied with the service. 94% would recommend it to a friend. 96% would reuse it. It reduced the clinic's and call center's staff labor by releasing clinic capacity.                                                                                                                                                                                                                         | <ul style="list-style-type: none"> <li>Improved patient satisfaction</li> <li>Reduced wait time</li> <li>Reduced staff labor</li> </ul>                                                                               |
| EppointmentPlus [8,9]                 | <ul style="list-style-type: none"> <li>Real-time</li> <li>Medical appointment SaaS</li> <li>Can integrate with the practice's management software</li> <li>Appointment time slots are categorized by visit types</li> </ul>                                                                                                                          | Not reported                                                                                          | This system kept doctors in control and reduced staff labor.                                                                                                                                                                                                                                                                                                                                                                                                                                                                                  | <ul style="list-style-type: none"> <li>Reduced staff labor</li> </ul>                                                                                                                                                 |
| NexShed Scheduware [8]                | <ul style="list-style-type: none"> <li>Real-time</li> <li>Medical appointment SaaS</li> <li>Can integrate with the practice's management software</li> <li>Can work together with traditional scheduling</li> <li>Can restrict the type and time of appointments</li> <li>Compatible with EHR systems from other vendors</li> </ul>                  | Not reported                                                                                          | This system kept doctors in control and reduced staff labor.                                                                                                                                                                                                                                                                                                                                                                                                                                                                                  | <ul style="list-style-type: none"> <li>Reduced staff labor</li> </ul>                                                                                                                                                 |
| Murray Hill Medical Group [10]        | <ul style="list-style-type: none"> <li>Real-time</li> <li>Patients can choose available appointment times but the amount of time for the appointment is not revealed to them</li> <li>Appointments will be confirmed by email</li> <li>Patients will receive two reminders</li> <li>Patients can view, cancel and reschedule appointments</li> </ul> | Not reported                                                                                          | Patient satisfaction were improved and failed appointments were reduced. 95% of the patients who had used the Web-based appointment service would not use other appointment methods. About 50% of the appointments were made for the next day and 90% were made for within two weeks. It saved the medical group \$170,000 annually due to the reduction of staff. Doctors' empty appointment slots were filled overnight and thus income was increased. The no-show rate decreased to less than 1% from about 8% (phone-based appointments). | <ul style="list-style-type: none"> <li>Improved satisfaction</li> <li>Reduced no-show rate</li> <li>Reduced wait time</li> <li>Reduced staff labor</li> <li>Improved efficiency</li> <li>Increased revenue</li> </ul> |

|                                                            |                                                                                                                                                                                                                                                                                                |                                                                        |                                                                                                                                                                                                                                                      |                                                                                                                                                                                             |
|------------------------------------------------------------|------------------------------------------------------------------------------------------------------------------------------------------------------------------------------------------------------------------------------------------------------------------------------------------------|------------------------------------------------------------------------|------------------------------------------------------------------------------------------------------------------------------------------------------------------------------------------------------------------------------------------------------|---------------------------------------------------------------------------------------------------------------------------------------------------------------------------------------------|
| TRICARE Online [8]                                         | <ul style="list-style-type: none"> <li>Real-time</li> <li>Appointment service for military hospitals or clinics by the US Department of Defense.</li> <li>Patients can schedule, view and cancel appointments</li> <li>Patients will receive up to three reminders by email or text</li> </ul> | Not reported                                                           | This system reduced the number of wrong appointment types and staff labor and improved patient satisfaction. Appointments made by TRICARE Online had lower no-show rate (2%) than those made by phone calls (8%).                                    | <ul style="list-style-type: none"> <li>Reduced wrong appointment types</li> <li>Improved satisfaction</li> <li>Reduced staff labor</li> <li>Reduced no-show rate</li> </ul>                 |
| Tiny Tots [11,12]                                          | <ul style="list-style-type: none"> <li>Real-time</li> <li>Proprietary appointment system for Tiny Tots D.D.O in Canada</li> <li>Rule-based</li> <li>Honors doctors' preferences by allowing their own appointment rules</li> </ul>                                                             | Not reported                                                           | Patients' and doctors' complaints about the reception staff decreased and the payments for visits increased. The number of staff and wages decreased by 33% and 2%, respectively.                                                                    | <ul style="list-style-type: none"> <li>Increased revenue</li> <li>Improved satisfaction</li> <li>Reduced staff labor</li> </ul>                                                             |
| Dartmouth-Hitchcock Medical Center [13,14]                 | <ul style="list-style-type: none"> <li>Asynchronous</li> <li>Clinical messaging service</li> <li>Patients can request, review, reschedule, and cancel appointments</li> </ul>                                                                                                                  | Not reported                                                           | This system reduced the call volume and cost and improved patient satisfaction. There was a 40-42% reduction in no-show rate. It also streamlined operations and increased staff efficiency.                                                         | <ul style="list-style-type: none"> <li>Reduced no-show rate [13,14]</li> <li>Streamlined operations and improved efficiency</li> <li>Improved satisfaction</li> <li>Reduced cost</li> </ul> |
| myMDAnderson [11]                                          | <ul style="list-style-type: none"> <li>Asynchronous</li> <li>Based on secure messaging</li> </ul>                                                                                                                                                                                              | Not reported                                                           | More than 3500 patients had used the service since it was released.                                                                                                                                                                                  | <ul style="list-style-type: none"> <li>Increased popularity</li> </ul>                                                                                                                      |
| HealthPartners [11]                                        | <ul style="list-style-type: none"> <li>Real-time</li> <li>Almost all appointments are scheduled for 20 minutes</li> </ul>                                                                                                                                                                      | Not reported                                                           | 1100 patients opened their accounts within 2 weeks after the system was released and about half of them had used the appointment service. It reduced the time to make an appointment.                                                                | <ul style="list-style-type: none"> <li>Increased popularity</li> <li>Reduced wait time</li> </ul>                                                                                           |
| PAMFOnline [15]                                            | <ul style="list-style-type: none"> <li>Asynchronous</li> <li>The appointment service is a component of the practice's patient portal</li> </ul>                                                                                                                                                | Online patient satisfaction survey 9 months after the general release. | In a survey 9 months after the release of the system, the Web-based appointment service was ranked at 4 in a 1 to 5 scale with 5 being extremely important. Phone-based appointments and walk-ins decreased and operational efficiency was improved. | <ul style="list-style-type: none"> <li>Reduced staff labor</li> <li>Improved operational efficiency</li> </ul>                                                                              |
| Geisinger Health System [16]                               | <ul style="list-style-type: none"> <li>Asynchronous</li> <li>Email-based</li> </ul>                                                                                                                                                                                                            | Not reported                                                           | This practice had about 1.8 million unique visits online, about twice that number in 2001.                                                                                                                                                           | <ul style="list-style-type: none"> <li>Increased popularity</li> </ul>                                                                                                                      |
| Deaconess Health System [16]                               | <ul style="list-style-type: none"> <li>The appointment service is a component of the practice's patient portal</li> </ul>                                                                                                                                                                      | Not reported                                                           | This practice had about 148,000 visits online each month, much higher than before adopting the system. This new system increased the total visits by about 168% over the first quarter of previous year.                                             | <ul style="list-style-type: none"> <li>Increased popularity</li> </ul>                                                                                                                      |
| Methodist Health Care System [16]                          | <ul style="list-style-type: none"> <li>Asynchronous</li> <li>The appointment service is a component of the practice's patient portal</li> </ul>                                                                                                                                                | Not reported                                                           | \$1.7 million of the expected revenue was attributed to the system.                                                                                                                                                                                  | <ul style="list-style-type: none"> <li>Increased revenue</li> </ul>                                                                                                                         |
| Hatboro Medical Associates [17]                            | <ul style="list-style-type: none"> <li>Asynchronous</li> <li>The appointment service is a component of the practice's web site</li> <li>Appointments will be verified by phone calls</li> <li>Patient cannot select time slots by themselves</li> </ul>                                        | Not reported                                                           | The practice's website reduced call volume, saved staff's time, improved overall efficiencies and income.                                                                                                                                            | <ul style="list-style-type: none"> <li>Reduced staff labor</li> <li>Improved efficiency</li> <li>Increased revenue</li> </ul>                                                               |
| Restorative Dental [18]                                    | <ul style="list-style-type: none"> <li>Asynchronous</li> <li>Email-based</li> </ul>                                                                                                                                                                                                            | Not reported                                                           | This appointment system reduced the average cost to make an appointment from \$70 to \$10 and saved staff's time.                                                                                                                                    | <ul style="list-style-type: none"> <li>Reduced cost</li> <li>Reduced staff labor</li> </ul>                                                                                                 |
| MyGroupHealth (MyGH) [19,20]                               | <ul style="list-style-type: none"> <li>Allows same-day appointments with primary care physicians</li> <li>The appointment service is a component of the MyGH system</li> </ul>                                                                                                                 | Surveys with both providers and patients. [20]                         | The MyGH system increased patient satisfaction and reduced health care costs. Shorter wait times and higher satisfaction were reported in surveys.                                                                                                   | <ul style="list-style-type: none"> <li>Reduced wait time</li> <li>Improved satisfaction</li> <li>Reduced cost</li> </ul>                                                                    |
| Ubiquitous Multicriteria Clinic Recommendation System [21] | <ul style="list-style-type: none"> <li>Designed to recommend clinics to patients in Taiwan</li> <li>Recommends clinics based on a patient's location, travel speed, potential waiting time in the clinic, and preference for a clinic</li> </ul>                                               | A field experiment with 10 patients.                                   | This system balanced patient load and reduced wait time.                                                                                                                                                                                             | <ul style="list-style-type: none"> <li>Balanced patient load</li> <li>Reduced wait time</li> </ul>                                                                                          |

## References

1. Appointments. Patient choice is the only option. *Health Serv J* 2009 Nov 19;119(6183):27. PMID: 20131473
2. Parmar V, Large A, Madden C, Das V. The online outpatient booking system "Choose and Book" improves attendance rates at an audiology clinic: a comparative audit. *Inform Prim Care* 2009;17(3):183-6. PMID: 20074431
3. Illman J. "Expedia" system for appointments. *Health Serv J* 2013 May 17;123(6351):9. PMID: 23879123
4. Knight A, Lembke T. Appointment zen - shaping demand and matching capacity. *Aust Fam Physician* 2014 Apr;43(4):234-8. PMID: 24701629
5. Siddiqui Z, Rashid R. Cancellations and patient access to physicians: ZocDoc and the evolution of e-medicine. *Dermatol Online J* 2013;19(4):14. PMID: 24021373
6. Cao W, Wan Y, Tu H, Shang F, Liu D, Tan Z, et al. A web-based appointment system to reduce waiting for outpatients: a retrospective study. *BMC Health Serv Res BioMed Central Ltd*; 2011;11(1):318. PMID: 22108389
7. Jones R, Menon-Johansson A, Waters AM, Sullivan AK. eTriage--a novel, web-based triage and booking service: enabling timely access to sexual health clinics. *Int J STD AIDS* 2010 Jan;21(1):30-3. PMID: 19884355
8. Lowes R. Let patients book their own appointments? *Med Econ* 2006 Jun 2;83(11):27-8. PMID: 16827528
9. Craig A. Self-service appointments. *Adv Nurse Pract* 2007 Oct;15(10):24-5. PMID: 19998876
10. Friedman JP. Internet patient scheduling in real-life practice. *J Med Pract Manage* 2004;20(1):13-5. PMID: 15500015
11. Online scheduling applications may improve customer satisfaction, but setup is not always easy. *Internet Healthc Strateg* 2004 May;6(5):1-5. PMID: 15181764
12. Real-time scheduling faces operational challenges. *Internet Healthc Strateg* 2005 Jan;7(1):1-6. PMID: 15712748
13. Walters BA, Danis K. Patient Online at Dartmouth-Hitchcock - interactive patient care web site. *AMIA Annu Symp Proc* 2003. p. 1044. PMID: 14728547
14. Lowes R. Phones driving you crazy? Try clinical messaging. *Med Econ* 2004 Mar 19;81(6):65, 69-72, 76. PMID: 15077492
15. Tang PC, Black W, Buchanan J, Young CY, Hooper D, Lane SR, et al. PAMFOnline: integrating EHealth with an electronic medical record system. *AMIA Annu Symp Proc* 2003. p. 644-8. PMID: 14728253
16. Romano M. Not just a Web site. In response to consumers as well as competitors, hospitals are getting more sophisticated with their Internet presence. *Mod Healthc* 2003 May 26;33(21):22-6. PMID: 12800289
17. Judd J. The benefits of a practice-managed web site. *MGMA Connex* 2002 Apr;2(4):25-6. PMID: 11949523
18. Farr C. Dentistry takes the cybercure: scheduling, consultations, records move to the net. *Dent Today* 2000 May;19(5):106-13. PMID: 12524769
19. Federowicz M. Improving access to improve quality: evaluation of an organizational innovation. *Find Brief* 2008 Aug;11(5):1-4. PMID: 18807646
20. Ralston JD, Martin DP, Anderson ML, Fishman PA, Conrad DA, Larson EB, et al. Group health cooperative's transformation toward patient-centered access. *Med Care Res Rev* 2009 Dec;66(6):703-24. PMID: 19549993
21. Chen T. Ubiquitous Multicriteria Clinic Recommendation System. *J Med Syst* 2016;40(5):113. PMID: 26984357
